# 1 **Apiaceae *FNS I* originated from *F3H* through tandem gene duplication**

2 Boas Pucker<sup>1,2</sup> and Massimo Iorizzo<sup>3,4</sup>

3 <sup>1</sup> Institute of Plant Biology, TU Braunschweig, Braunschweig, Germany

4 <sup>2</sup> BRICS, TU Braunschweig, Braunschweig, Germany

5 <sup>3</sup> Plants for Human Health Institute, NC State University, Kannapolis, North Carolina, USA

6 <sup>4</sup> Department of Horticultural Science, NC State University, Raleigh, North Carolina, USA

7

8 Corresponding authors: [b.pucker@tu-braunschweig.de](mailto:b.pucker@tu-braunschweig.de); [miorizz@ncsu.edu](mailto:miorizz@ncsu.edu)

9

## 10 **Abstract**

11 **Background:** Flavonoids are specialized metabolites with numerous biological functions in stress  
12 response and reproduction of plants. Flavones are one subgroup that is produced by the flavone  
13 synthase (FNS). Two distinct enzyme families evolved that can catalyze the biosynthesis of flavones.  
14 While the membrane-bound FNS II is widely distributed in seed plants, one lineage of soluble FNS I  
15 appeared to be unique to Apiaceae species.

16 **Results:** We show through phylogenetic and comparative genomic analyses that Apiaceae *FNS I* evolved  
17 through tandem gene duplication of flavanone 3-hydroxylase (*F3H*) followed by neofunctionalization.  
18 Currently available datasets suggest that this event happened within the Apiaceae in a common  
19 ancestor of *Daucus carota* and *Apium graveolens*. The results also support previous findings that *FNS I* in  
20 the Apiaceae evolved independent of *FNS I* in other plant species.

21 **Conclusion:** We validated a long standing hypothesis about the evolution of Apiaceae *FNS I* and  
22 predicted the phylogenetic position of this event. Our results explain how an Apiaceae-specific *FNS I*  
23 lineage evolved and confirm independence from other *FNS I* lineages reported in non-Apiaceae species.

24

## 25 **Keywords**

26 Flavone synthase, flavanone 3-hydroxylase, flavonoid biosynthesis, carrot, comparative genomics,  
27 neofunctionalization, evolution, tandem gene duplication

28

## 29 Introduction

30 A plethora of specialized metabolites including flavonoids are produced by plants. These compounds  
31 provide an evolutionary advantage under certain environmental conditions. Flavonoids are produced in  
32 response to stresses like ultra violet (UV) radiation, cold, or drought [1, 2]. Especially visible is the  
33 pigmentation of flowers and fruits by anthocyanins which are one subclass of the flavonoids [3, 4]. Other  
34 subclasses include the proanthocyanidins which contribute to the pigmentation of seed coats [5] or  
35 flavonols which are produced in response to UV stress [6]. These branches of the flavonoid biosynthesis  
36 are well studied and conserved in many plant species and represent a model system for the  
37 investigation of the specialized metabolism in plants. A less conserved branch of the flavonoid  
38 biosynthesis leads to flavones (Fig 1), which are important in signaling and defense against pathogens  
39 [7]. Flavones are derivatives of phenylalanine which is channeled through the general phenylpropanoid  
40 pathway to the chalcone synthase (CHS). This enzyme is the first committed step of the flavonoid  
41 biosynthesis. Chalcone isomerase (CHI) and flavone synthase (FNS) represent the following steps  
42 involved in the formation of the flavone apigenin. F3'H can convert naringenin into eriodictyol which  
43 serves as substrate for the formation of the flavone luteolin (Fig 1). FNS activity evolved independently  
44 in different phylogenetic lineages [8], and to date two types of FNS genes have been described, named  
45 FNSI and FNSII. Distributed over a wide phylogenetic range is FNS II, a membrane-bound cytochrome  
46 P450-dependent monooxygenase [9]. An independent lineage of FNS I, a soluble Fe<sup>2+</sup>/2-oxoglutarate-  
47 dependent dioxygenase (2-ODD), was identified in the Apiaceae and appeared to be restricted to that  
48 family [10]. However, other studies report FNS I functionality in other plant species like OsFNSI in *Oryza*  
49 *sativa* [11], EaFNSI in *Equisetum arvense* [12], PaFNSI in *Plagiochasma appendiculatum* [13], AtDMR6 in  
50 *Arabidopsis thaliana* [14], and ZmFNSI-1 in *Zea mays* [14]. These lineages were presented as  
51 independent evolutionary events and are not orthologs of Apiaceae *FNS I* [8, 15]. Recently, a study  
52 revealed that FNS I is widely distributed in liverworts and is the most likely origin of seed plant flavanone  
53 3-hydroxylase (F3H) [8]. Reports of enzymes with multiple functions like F3H/FNS I [8, 10] or F3H/FLS  
54 [16, 17] indicate that the 2-ODD family has a high potential for the acquisition of new functionalities and  
55 that independent evolution of these new functions might happen frequently.

56 It is assumed that flavone biosynthesis is an evolutionarily old trait that predates flavonol and  
57 anthocyanin biosynthesis, because the ancestor of the F3H was probably a FNS I [8]. Minor changes in  
58 sequence and protein structure can determine the change in enzyme function. One particularly  
59 important residue is Y240 in the liverwort *Plagiochasma appendiculatum* PaFNSI/F2H [13]. Bifunctional  
60 *Physcomitrella patens* and *Selaginella moellendorffii* enzymes show M or F residues at this site. Most  
61 angiosperms and gymnosperms show a P at the corresponding position of their F3Hs [8]. Substitution of  
62 this P by M or F resulted in reduced F3H activity and increased FNS I activity, while a replacement with Y  
63 resulted in dominant FNS I activity [8]. This indicates that this site played a crucial role in the transition  
64 from FNS I to F3H activity.

65 Apiaceae FNS I show high sequence similarity to F3H thus both were previously classified as DOXC28 in a  
66 systematic investigation of the 2-ODD family [18]. Another study called this group of 2-ODD sequences  
67 'POR', because they are NADPH-cytochrome P450 oxidoreductases [19]. It was also hypothesized that  
68 Apiaceae *FNS I* evolved from *F3H* of seed plants by duplication and subsequent divergence [10, 19, 20].

69 F3H and FNS I accept the same substrate (Fig 1) which suggests that competition takes place if both  
 70 enzymes are present at the same intracellular location. The specific activity of both enzymes in the  
 71 Apiaceae is defined by a small number of diagnostic amino acid residues [8, 10]. It is important to note  
 72 that the P/Y substitution [8] described above does not play a role in the Apiaceae, because FNS I and  
 73 F3H sequences show a conserved P at this position. Substitution of several other amino acids in F3H  
 74 results in FNS I activity though [10]. For instance, I131F, M106T, and D195E are sufficient to confer  
 75 partial FNS I function to F3H [10]. Also, I131F with L215V and K216R can be sufficient to confer FNS I  
 76 functionality [10]. A substitution of these seven amino acid residues substantially modifies the pocket of  
 77 the active site hence changing the orientation of the substrate [10]. This is expected to cause a syn-  
 78 elimination of hydrogen from carbon-2 (FNS activity) instead of hydroxylation of carbon-3 (F3H activity)  
 79 [10].

80

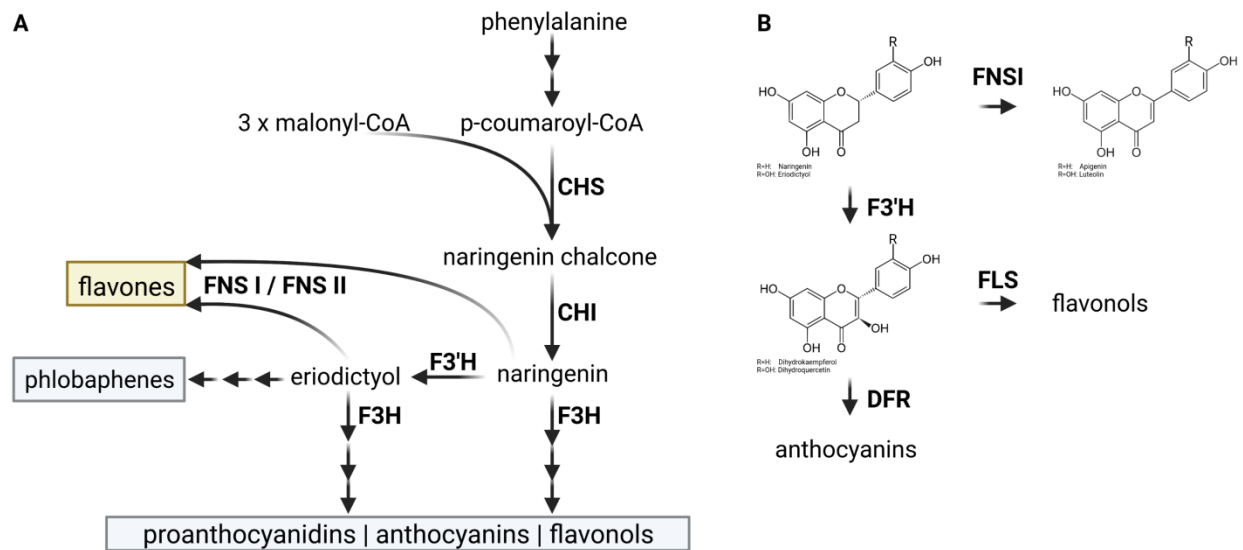

81

82 **Fig 1.** (A) Simplified illustration of the flavonoid biosynthesis with focus on the flavone biosynthesis. CHS  
 83 (naringenin-chalcone synthase), CHI (chalcone isomerase), F3H (flavanone 3-hydroxylase), F3'H  
 84 (flavonoid 3'-hydroxylase), and FNS (flavone synthase). (B) Reactions catalyzed by FNS I and F3H in the  
 85 context of the flavonoid biosynthesis.

86 Although previous work hypothesized that Apiaceae FNS I originated from F3H through duplication and  
 87 neofunctionalization [10, 19, 20], this hypothesis has not yet been validated. The recent release of high  
 88 quality genome sequences representing most angiosperm lineages including members of the Apiaceae  
 89 family [21–24] opens the opportunity to address this hypothesis. Here, we investigated the evolution of  
 90 FNS I in the Apiaceae through phylogenetic analysis and comparative genomics. The results indicate that  
 91 FNS I originated from a tandem duplication of F3H that was followed by a neofunctionalization event.

92

93

94

## 95 **Methods**

### 96 **Datasets**

97 The genome sequences and the corresponding annotation of *Daucus carota* 388\_v2.0 [21] and *Panax*  
98 *ginseng* GCA\_020205605.1 [22] were retrieved from Phytozome [25]. The genome sequences of *Apium*  
99 *graveolens* GCA\_009905375.1 [23] and *Centella asiatica* GCA\_014636745.1 [24] were downloaded from  
100 NCBI. Sequences of F3H and FNS I were retrieved from the KIPes v1 data set [26] and are included in S1  
101 File. The phylogenetic relationships of Apiaceae species were inferred from a previously constructed  
102 species tree [27]. This tree was used to arrange genome sequences in the synteny analysis.

### 103 **Gene prediction**

104 Since no complete annotation of the coding sequences was publicly available for *Apium graveolens* and  
105 *Centella asiatica*, we applied AUGUSTUS v3.3 [28] for an *ab initio* gene prediction with previously  
106 described settings [29]. The *Daucus carota* annotation of F3H and FNS I was manually checked in the  
107 Integrated Genomics Viewer [30] and revised (S1 File). Polishing of the gene models was based on a  
108 TBLASTN v2.8.1 [31] alignment of the *Petroselinum crispum* FNS I sequence against the *D. carota*  
109 genome sequence. Additionally, RNA-seq reads were retrieved from the Sequence Read Archive (S2 File)  
110 and aligned to the *D. carota* genome sequence using STAR v2.7.3a [32] with previously described  
111 parameters [33].

### 112 **Alignment and phylogenetic tree construction**

113 F3H and FNS I polypeptide sequence collections [26] were used to search for additional candidates in *C.*  
114 *asiatica*, *D. carota*, and *A. graveolens* using a BLASTp-based Python script [34]. Initial candidates were  
115 validated through a phylogeny constructed with FastTree v2.1.10 (-wag -nosupport) [35] based on a  
116 MAFFT v7.475 [36] alignment of the polypeptide sequences. Additional phylogenies were constructed  
117 based on the collected polypeptide sequences with different approaches to validate important  
118 relationships. MAFFT v7.475 [36] and MUSCLE v5.1 [37] were applied for the alignment construction  
119 with default parameters. A customized Python script (alntrim.py, [34]) was applied to remove  
120 alignment columns with less than 10% occupancy. The maximum likelihood tree displayed in Fig 2 is  
121 based on the MAFFT alignment running RAxML-NG v1.0.1 [38] with LG+G8+F and 10300 rounds of  
122 bootstrapping. RAxML-NG was also run with the same model based on a MUSCLE5 alignment of the  
123 same polypeptide sequences. Phylogenies for both alignments were also generated with FastTree2 [35]  
124 (-wag), IQ-TREE v1.6.12 (-alrt 1000 -bb 1000)[39, 40], and MEGA v11.0.13 [41] (neighbor-joining, 1000  
125 bootstrap replicates, poisson model, uniform rates, pairwise deletion). The resulting tree topologies  
126 were manually compared to validate (1) important nodes, (2) monophyly of FNS I, and (3) position of the  
127 FNS I clade within the F3H clade of the Apiaceae.

128

### 129 **Synteny analysis**

130 JCVI/MCscan [42] was applied to compare the genome sequences of *P. ginseng*, *C. asiatica*, *D. carota*,  
131 and *A. graveolens*. The region around F3H and FNS I was manually selected. Connections of genes

132 between the species were manually validated and revised based on phylogenetic trees (S3 File).  
133 TBLASTN v2.8.1 (-evalue 0.00001) [43] was run with the *P. crispum* FNS I against the genome sequence  
134 of *C. asiatica* and *A. graveolens* to identify gene copies that might be missing in the annotation. The  
135 results of this search were compared against the annotation to find BLAST hits outside of gene models  
136 [34]. The best hits were assessed in a phylogenetic tree with previously characterized F3H and FNS I  
137 sequences.

### 138 Gene expression analysis

139 Paired-end RNA-seq data sets were retrieved from the Sequence Read Archive via fastq-dump v2.8.1  
140 [44] (S2 File). kallisto v0.44 [45] was applied with default parameters for the quantification of gene  
141 expression (counts and TPMs). A Python script was developed for the generation of violin plots to  
142 illustrate the variation of gene expression (TPMs) across various samples [34]. Outliers, defined as data  
143 points which are more than three interquartile ranges away from the median, were excluded from this  
144 visualization. Co-expression was analyzed by calculating pairwise Spearman correlation coefficients of  
145 gene expression values across all samples. Lowly expressed genes were excluded and only pairs with a  
146 correlation coefficient >0.65 and an adjusted p-value < 0.05 were reported. Functional annotation of the  
147 *Daucus carota* genes (Dcarota\_388\_v2.0) was inferred from *Arabidopsis thaliana* based on reciprocal  
148 best BLAST hits of the representative peptide sequences as previously described [29, 46]. This co-  
149 expression analysis was implemented in a Python script (coexp3.py) which is available via github [34]  
150 and as an online service [47].

151

## 152 Results

153 Apiaceae FNS I sequences show high similarity to F3H that suggest a close phylogenetic relationship of  
154 both lineages. For example, *D. carota* FNS I and F3H have 78% identical amino acids, while the  
155 proportion of identical amino acids between different FNS I candidates is 80% (S4 File). A phylogenetic  
156 tree was constructed to visualize the relationship of all these sequences in a larger context. FNS I  
157 sequences of the non-Apiaceae species *Arabidopsis thaliana*, *Oryza sativa*, *Zea mays*, and *Parmotrema*  
158 *appendiculatum* clustered outside the F3H clade in this tree. The FNS I sequences of seven Apiaceae  
159 species formed a distinct clade (Fig 2). This FNS I clade is embedded within a large clade of F3H  
160 sequences that included a wide range of phylogenetically distant plants. The position of the FNS I  
161 sequences within the F3H clade suggests that Apiaceae FNS I originated from F3H. The pattern also  
162 supports a single FNS I origin within the Apiaceae. The critical node separating Apiaceae FNS I from  
163 Apiaceae F3H is well supported in the results of all applied tools (S3 File). The monophyly of the  
164 Apiaceae FNS I clade is also well supported in all analyses. The FNS I sequences of non-Apiaceae species  
165 seem to have an independent origin.

166

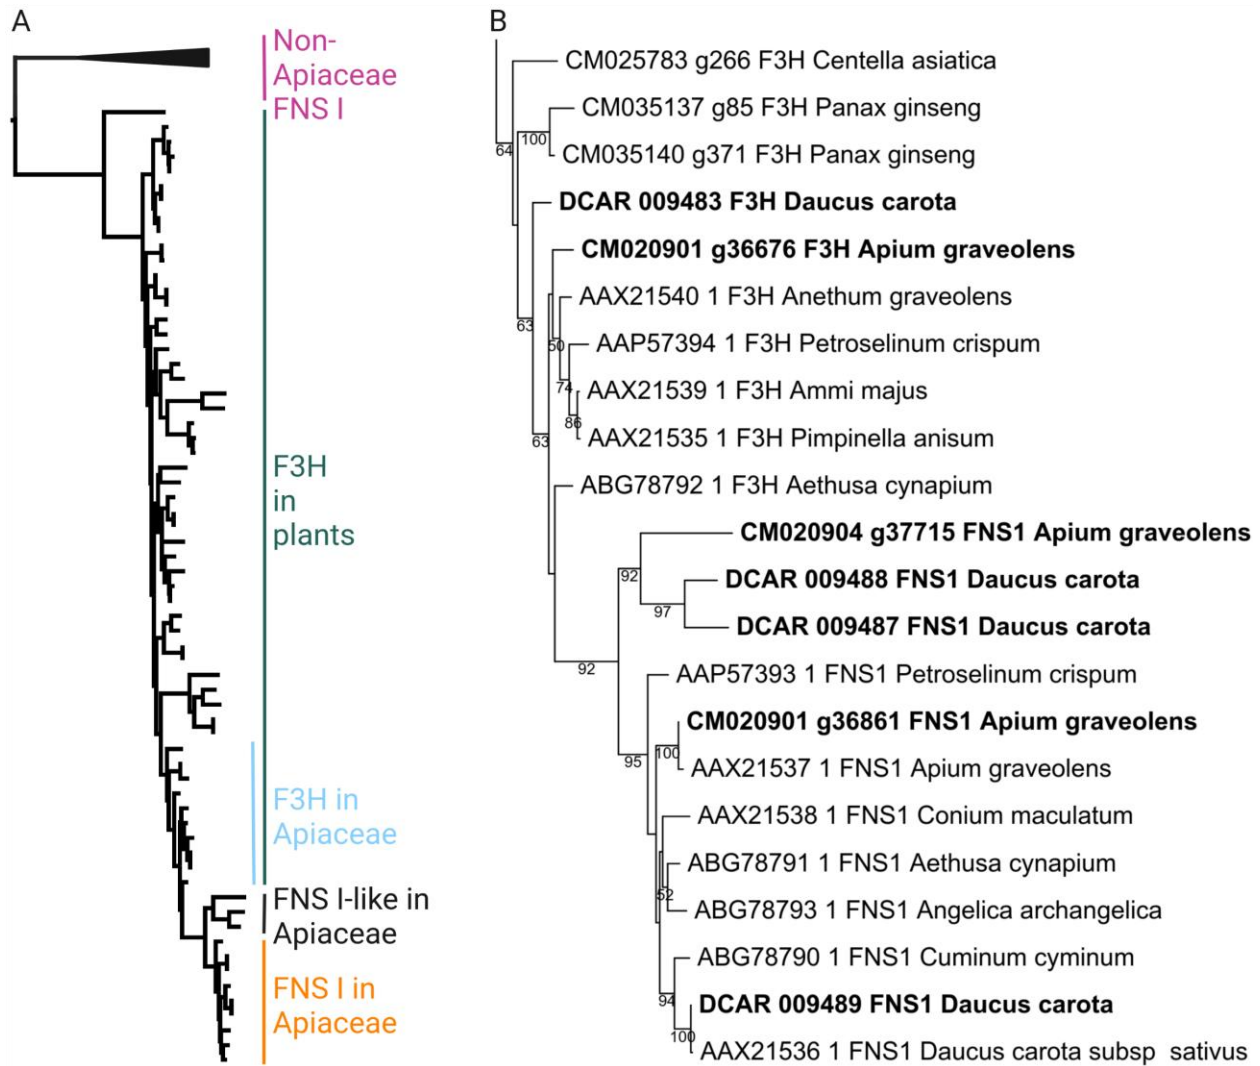

167

168 **Fig 2.** (A) Maximum likelihood tree of F3H and FNS I sequences. Apiaceae FNS I sequences form a nested  
169 cluster within the F3H context. The FNS I sequences of non-Apiaceae species are placed outside the F3H  
170 clade. Polypeptide sequences used for the construction of this tree are included in S1 File. A full  
171 phylogenetic tree with sequence names is included as S3 File. (B) Apiaceae clade in the maximum  
172 likelihood tree of F3H and FNS I sequences. Sequences analyzed in Table 1 are written in bold.  
173 Classification of sequences in the Apiaceae F3H, Apiaceae FNS I, and Apiaceae FNS I-clades were  
174 supported by RAXML, FastTree, MEGA, and IQ-TREE analyses. Support values above 50 are given for the  
175 individual branches.

176

177 A previous study identified diagnostic amino acid residues that determine the FNS or F3H activity,  
178 respectively [10]. It was demonstrated that a substitution of selected amino acid residues can convert  
179 one enzyme into the other. We inspected these characteristic features of the FNS I and F3H sequences  
180 of *Daucus carota* and *Apium graveolens* (Table 1). The results suggest that there is one *bona fide* F3H in  
181 *D. carota* (DCAR\_009483) and *A. graveolens* (CM020901\_g36676), respectively (S1 File). We also

182 identified one FNS I in each of these species: DCAR\_009489 and CM020901\_g36861, respectively. In  
 183 addition, there are FNS I-like copies which lack some of the functionally important amino acid residues  
 184 of a *bona fide* FNS I (Table 1). The separation of the *FNS I*-like lineage from the *FNS I* lineage seems to  
 185 predate a duplication in the *FNS I*-like lineage that produced the two copies discovered in *D. carota* and  
 186 *A. graveolens*.

187

188

189 **Table 1.** Inspection of diagnostic amino acid residues in FNS I and F3H candidates of *Daucus carota* and  
 190 *Apium graveolens*. FNS I residues are highlighted in orange, F3H residues are highlighted in skyblue.  
 191 Positions are based on the FNS I of *Petroselinum crispum* (AAP57393.1).

| Sequence        | Name                | 106 | 115 | 116 | 131 | 195 | 200 | 215 | 216 |
|-----------------|---------------------|-----|-----|-----|-----|-----|-----|-----|-----|
| DCAR_009489     | <i>DcFNS I</i>      | T   | T   | I   | F   | E   | I   | V   | R   |
| DCAR_009487     | <i>DcFNS I-like</i> | P   | I   | V   | F   | E   | I   | C   | R   |
| DCAR_009488     | <i>DcFNS I-like</i> | T   | T   | V   | F   | E   | I   | V   | R   |
| DCAR_009483     | <i>DcF3H</i>        | M   | I   | V   | I   | D   | V   | L   | K   |
| CM020904_g37715 | <i>AgFNS I-like</i> | T   | T   | I   | F   | K   | I   | C   | R   |
| CM020901_g36861 | <i>AgFNS I</i>      | T   | T   | I   | F   | E   | I   | V   | R   |
| CM020901_g36676 | <i>AgF3H</i>        | M   | I   | V   | I   | D   | V   | L   | K   |

192

193

194 To narrow down the origin of the Apiaceae *FNS I*, we compared highly contiguous genome sequences of  
 195 Apiaceae and outgroup species. The Apiaceae members *Daucus carota* and *Apium graveolens* show  
 196 microsynteny in a region that harbors both, *F3H* and *FNS I* genes (Fig 3). Both species differ from the  
 197 *Centella asiatica* (basal Apiaceae species) and *Panax ginseng* (outgroup species) which do not show a  
 198 *FNS I* gene in this region or elsewhere in the genome sequence. However, the presence of *F3H* and  
 199 synteny of many flanking genes indicates that the correct region was analyzed.

200

201

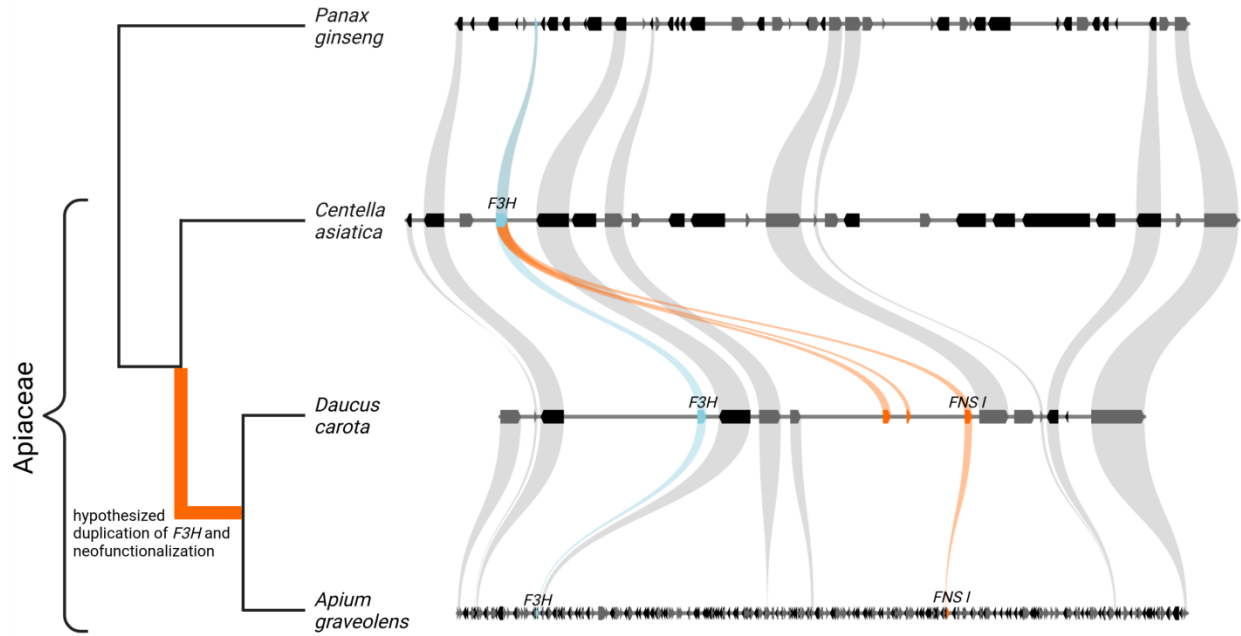

202

203 **Fig 3.** Syntenic region between the Apiaceae species *Daucus carota* and *Apium graveolens* shows *F3H*  
204 (*skyblue*) and *FNS I* (*orange*) in close proximity, while *FNS I* was not observed in the basal Apiaceae  
205 species *Centella asiatica* or in the outgroup *Panax ginseng*.

206

207 Although multiple gene copies were identified based on the available genome sequences, expression of  
208 these genes determines their relevance. Expression of the *F3H*, *FNS I*, and *FNS I*-like genes in carrots was  
209 analyzed across 146 RNA-seq samples (Fig 4). The results show that *F3H* and *FNS I* show substantially  
210 higher expression than any of the *FNS I*-like genes (DCAR\_009487) while the other *FNS I*-like gene  
211 (DCAR\_009488) is almost not expressed. Expression analysis in specific plant parts and tissues revealed  
212 that *F3H* (DCAR\_009483) is strongly expressed in phloem and flowers, while *FNS I* (DCAR\_009489) was  
213 dominant in leaf, petiole, and root (Fig 4). Expression patterns of both *FNS I*-like genes are more similar  
214 to *FNS I* than to *F3H* expression. Strongest expression of DCAR\_009487 was observed in the phloem and  
215 xylem of the root and in the petiole. DCAR\_009488 showed the highest expression in whole flowers and  
216 stressed leaves of orange cultivars (S2 File). Co-expression analyses results are only available for *F3H* and  
217 *FNS I*, because the expression of the *FNS I*-like genes is too low to be analyzed. *F3H* shows a strong co-  
218 expression with genes of the anthocyanin biosynthesis including *CHS*, *CHI*, *F3'H*, *DFR*, *LDOX*, several  
219 glycosyl transferase encoding genes, and a potential anthocyanin transporter encoding gene (S5 File). In  
220 contrast, *FNS I* shows a strong association with the flavonol biosynthesis most notable is the co-  
221 expression with *FLS1* (S6 File).



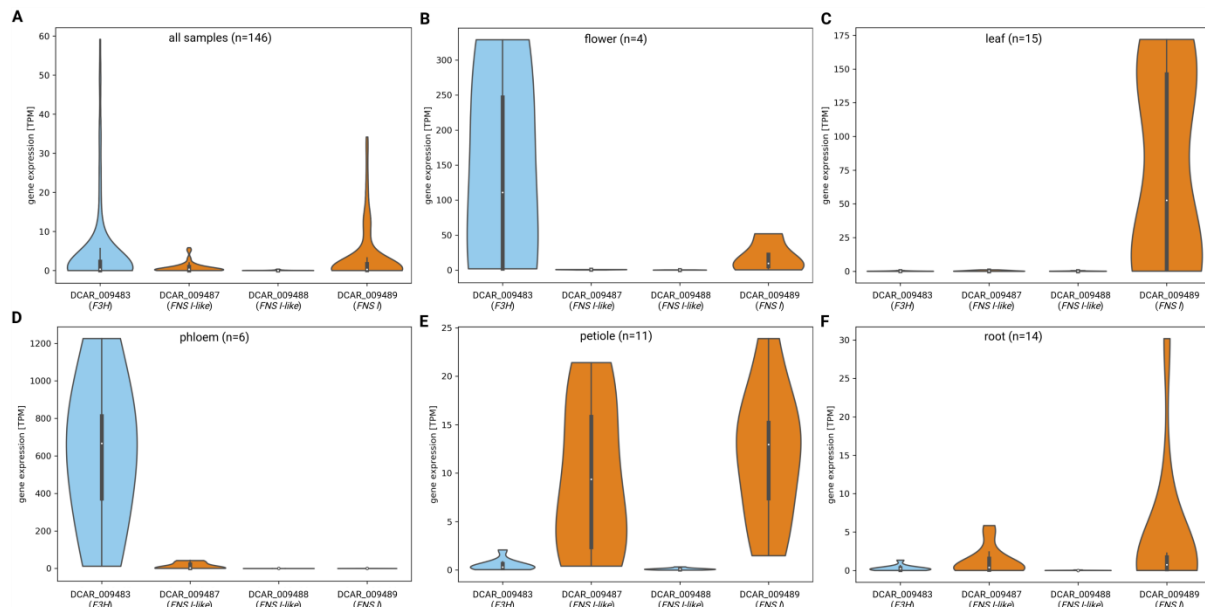

222

223 **Fig 4.** Expression of *F3H*, *FNS I*, and *FNS I*-like genes in carrots. (A) This plot shows the distribution of  
224 transcript per million (TPM) values across 146 RNA-seq data sets derived from different tissues/organs  
225 and conditions (S2 File). These aggregated expression data reveal that *F3H* (DCAR\_009483) and *FNS I*  
226 (DCAR\_009489) are expressed in several samples, while *FNS I*-like (DCAR\_009487) is only weakly  
227 expressed in a few selected samples and *FNS I*-like (DCAR\_009488) is almost not expressed at all. (B-F)  
228 Plots show the expression of the four genes in specific tissues covering flower, leaf, phloem, petiole, and  
229 root. This tissue-specific gene expression analysis was restricted to samples with available metadata  
230 about the respective sample.

231

## 232 Discussion

233 We provide genomic and phylogenetic evidence for the evolution of the Apiaceae *FNS I* from *F3H*  
234 through tandem duplication followed by neofunctionalization. These results support a hypothesis about  
235 the evolution of *FNS I* from *F3H* [20, 48] and narrow down the initial duplication event. The phylogenetic  
236 analysis provides strong support for a single event of Apiaceae *FNS I* evolution. The nested position of  
237 the Apiaceae *FNS I* clade within the Apiaceae *F3H* clade is also well supported, while some relationships  
238 between *F3H* sequences of the angiosperms have only low or moderate support.

239 We show that the *F3H* duplication most likely took place in a shared ancestor of *D. carota* and *A.*  
240 *graveolens*, and is probably not shared with all members of the Apiacea family as previously  
241 hypothesized. Since there is no evidence for this gene duplication in *C. asiatica* which branches early in  
242 the Apiaceae, we hypothesize that the *F3H* duplication took place after the separation of *C. asiatica*  
243 from the *Daucus*/*Apium* lineage (Fig 3). Additional genome sequences will help to support this  
244 hypothesis and to narrow down the precise duplication event within the Apiaceae lineage.

245 The inspection of conserved amino acid residues in *D. carota* and *A. graveolens* candidate sequences  
246 confirmed the presence of one F3H and FNS I in each species. Additionally, both species have at least  
247 one sequence that lacks some of the functionally important amino acid residues of a *bona fide* FNS I  
248 without having all residues of a F3H (Table 1). This might indicate a different enzymatic activity or  
249 promiscuity of these enzymes. It is striking to see that the F3H and FNS I cannot be distinguished based  
250 on a P/Y substitution at position 240 (based on *Plagiochasma appendiculatum* PaFNSI/F2H). This  
251 difference was previously reported between ancestral FNS I sequences and the sequences of  
252 monocot/dicot F3H sequences [8]. All Apiaceae FNS I and F3H sequences show a conserved P at this  
253 position suggesting that two independent shifts between F3H and FNS I activity are possible. According  
254 to substitution experiments [10], the presence of T106, F131, and E195 in DCAR\_009488 indicates that  
255 this enzyme has at least some basal FNS activity. It is possible that FNS I-like enzymes have multiple  
256 activities [8]. Based on the diagnostic amino acid residues alone, we cannot tell whether (1) these  
257 sequences have lost their FNS function in secondary events or (2) represent intermediates in the  
258 evolution from F3H towards FNS I. However, the incorporation of additional residues places these  
259 sequences in a sister clade to FNS I (Fig 2). This suggests that residues shared between FNS I and FNS I-  
260 like sequences were probably present in the shared common ancestor (e.g. F131, I200, R216), while  
261 additional FNS I specific residues evolved after separation of both lineages. Based on their phylogenetic  
262 relationship, we hypothesize that two *FNS I* copies were present in the common ancestor of *D. carota*  
263 and *A. graveolens*. One of these copies was again duplicated in *D. carota* after separation of the lineages  
264 leading to *D. carota* and *A. graveolens* hence explaining the presence of three copies in *D. carota*. The  
265 preservation of these sequences since the separation of both species indicates a relevance of these FNS  
266 I-like sequences. The expression analysis suggests that these genes are active in specific tissues like  
267 petiole and root where *FNS I* is also active.

268 The physical clustering of *FNS I* and *F3H* in the genome could be due to the recent tandem duplication.  
269 However, it could be interesting to investigate whether this clustering does also provide an evolutionary  
270 benefit. Biosynthetic gene clusters (BGCs) were previously described in numerous plant species [49, 50].  
271 These BGCs are often associated with an evolutionary young trait that provides a particular advantage  
272 e.g. in the defense against a pathogen [49]. Given the relevance of flavones in the defense against  
273 pathogens [7, 51], it seems possible that the flavone biosynthesis could be a similar trait that evolved in  
274 the Apiaceae.

275 *FNS I* genes were also discovered in a small number of non-Apiaceae species [11, 13, 14]. However,  
276 these genes belong to an independent *FNS I* lineage [8]. As more high quality genome sequences of seed  
277 plants are released, a systematic search for additional non-Apiaceae *FNS I* sequences could become  
278 feasible in the near future. The number of independent FNS I origins remains unknown. Exploration and  
279 comparison of additional *FNS I* lineages across plants has the potential to advance our understanding of  
280 enzyme evolution.

281

## 282 **Conclusions**

283 In conclusion here we uncovered the duplication mechanism that gave rise to *FNS I* within the Apiaceae  
284 family. The gene probably evolved from a tandem duplication of *F3H* followed by neofunctionalization.  
285 The origin of Apiacea *FNS I* appears to be independent from *FNS I* genes described in *Arabidopsis*  
286 *thaliana*, *Oryza sativa*, and *Zea mays*.

287

288

## 289 **Declarations**

### 290 **Ethics approval and consent to participate**

291 Not applicable.

### 292 **Consent for publication**

293 Not applicable.

### 294 **Availability of data and materials**

295 All datasets underlying this study are publicly available or included within the additional files. Scripts  
296 developed for this work are freely available on github: <https://github.com/bpucker/ApiaceaeFNS1>.

### 297 **Competing interests**

298 The authors have declared that no competing interests exist.

### 299 **Funding**

300 MI was supported by the United States Department of Agriculture National Institute of Food and  
301 Agriculture, Hatch project 1008691 and award number 2022-67013-36389. We acknowledge support by  
302 the Open Access Publication Funds of Technische Universität Braunschweig.

### 303 **Authors' contribution**

304 BP and MI performed the analyses and wrote the manuscript.

### 305 **Acknowledgements**

306 Many thanks to the German network for bioinformatics infrastructure (de.NBI, grant 031A533A) and the  
307 Bioinformatics Resource Facility (BRF) at the Center for Biotechnology (CeBiTec) at Bielefeld University  
308 for providing an environment to perform the computational analyses. We used bioRender.com for the  
309 construction of some figures. We thank Hanna Marie Schilbert for discussion and comments on the  
310 manuscript.

311

## 312 **Supporting information**

313 **S1 File.** Collection of *F3H*, *FNS I*, and *FNS I*-like sequences that were used for the analyses of this study.

314 **S2 File.** Gene expression values (TPMs) of *Daucus carota F3H*, *FNS I*, and *FNS I*-like genes.

315 **S3 File.** Phylogenetic trees of F3H, FNS I, and FNS I-like sequences. (A) Constructed by RAxML based on a  
316 MAFFT alignment, (B) constructed by RAxML based on a MUSCLE5 alignment, (C) Constructed by  
317 FastTree2 based on a MAFFT alignment, (D) Constructed by FastTree2 based on a MUSCLE5 alignment,  
318 (E) constructed by IQ-TREE based on a MAFFT alignment, (F) constructed by IQ-TREE based on a  
319 MUSCLE5 alignment, (G) constructed by MEGA based on a MAFFT alignment, and (H) constructed by  
320 MEGA based on a MUSCLE5 alignment.

321 **S4 File.** Pairwise comparison of F3H and FNS I sequences. Percentage of identical amino acid residues is  
322 displayed in this matrix.

323 **S5 File.** Results of a co-expression analysis of *F3H* (DCAR\_009483) in *Daucus carota* based on 146 RNA-  
324 seq data sets.

325 **S6 File.** Results of a co-expression analysis of *FNS I* (DCAR\_009489) in *D. carota* based on 146 RNA-seq  
326 data sets.

327

## 328 **References**

329

330 1. Winkel-Shirley B. Biosynthesis of flavonoids and effects of stress. *Current Opinion in Plant Biology*.  
331 2002;5:218–23.

332 2. Nakabayashi R, Mori T, Saito K. Alternation of flavonoid accumulation under drought stress in  
333 *Arabidopsis thaliana*. *Plant Signal Behav*. 2014;9:e29518.

334 3. Winkel-Shirley B. Flavonoid Biosynthesis. A Colorful Model for Genetics, Biochemistry, Cell Biology,  
335 and Biotechnology. *Plant Physiology*. 2001;126:485–93.

336 4. Grotewold E. The genetics and biochemistry of floral pigments. *Annu Rev Plant Biol*. 2006;57:761–80.

337 5. Todd JJ, Vodkin LO. Pigmented Soybean (*Glycine max*) Seed Coats Accumulate Proanthocyanidins  
338 during Development. *Plant Physiology*. 1993;102:663–70.

339 6. Emiliani J, Grotewold E, Falcone Ferreyra ML, Casati P. Flavonols protect *Arabidopsis* plants against  
340 UV-B deleterious effects. *Mol Plant*. 2013;6:1376–9.

341 7. Jiang N, Doseff AI, Grotewold E. Flavones: From Biosynthesis to Health Benefits. *Plants*. 2016;5:27.

342 8. Li D-D, Ni R, Wang P-P, Zhang X-S, Wang P-Y, Zhu T-T, et al. Molecular Basis for Chemical Evolution of  
343 Flavones to Flavonols and Anthocyanins in Land Plants. *Plant Physiol*. 2020;184:1731–43.

344 9. Martens S, Forkmann G. Cloning and expression of flavone synthase II from *Gerbera* hybrids. *The*  
345 *Plant Journal*. 1999;20:611–8.

346 10. Gebhardt YH, Witte S, Steuber H, Matern U, Martens S. Evolution of Flavone Synthase I from Parsley  
347 Flavanone 3 $\beta$ -Hydroxylase by Site-Directed Mutagenesis. *Plant Physiol*. 2007;144:1442–54.

- 348 11. Lee YJ, Kim JH, Kim BG, Lim Y, Ahn J-H. Characterization of flavone synthase I from rice. *BMB Rep.*  
349 2008;41:68–71.
- 350 12. Bredebach M, Matern U, Martens S. Three 2-oxoglutarate-dependent dioxygenase activities of  
351 *Equisetum arvense* L. forming flavone and flavonol from (2S)-naringenin. *Phytochemistry.* 2011;72:557–  
352 63.
- 353 13. Han X-J, Wu Y-F, Gao S, Yu H-N, Xu R-X, Lou H-X, et al. Functional characterization of a *Plagiochasma*  
354 *appendiculatum* flavone synthase I showing flavanone 2-hydroxylase activity. *FEBS Lett.* 2014;588:2307–  
355 14.
- 356 14. Falcone Ferreyra ML, Emiliani J, Rodriguez EJ, Campos-Bermudez VA, Grotewold E, Casati P. The  
357 Identification of Maize and Arabidopsis Type I FLAVONE SYNTHASEs Links Flavones with Hormones and  
358 Biotic Interactions. *Plant Physiol.* 2015;169:1090–107.
- 359 15. Wang Q-Z, Downie SR, Chen Z-X. Genome-wide searches and molecular analyses highlight the  
360 unique evolutionary path of flavone synthase I (FNSI) in Apiaceae. *Genome.* 2018;61:103–9.
- 361 16. Prescott AG, Stamford NPJ, Wheeler G, Firmin JL. In vitro properties of a recombinant flavonol  
362 synthase from *Arabidopsis thaliana*. *Phytochemistry.* 2002;60:589–93.
- 363 17. Schilbert HM, Schöne M, Baier T, Busche M, Viehöver P, Weisshaar B, et al. Characterization of the  
364 *Brassica napus* Flavonol Synthase Gene Family Reveals Bifunctional Flavonol Synthases. *Frontiers in*  
365 *Plant Science.* 2021;12.
- 366 18. Kawai Y, Ono E, Mizutani M. Evolution and diversity of the 2-oxoglutarate-dependent dioxygenase  
367 superfamily in plants. *The Plant Journal.* 2014;78:328–43.
- 368 19. Andersen TB, Hansen NB, Laursen T, Weitzel C, Simonsen HT. Evolution of NADPH-cytochrome P450  
369 oxidoreductases (POR) in Apiales – POR 1 is missing. *Molecular Phylogenetics and Evolution.*  
370 2016;98:21–8.
- 371 20. Martens S, Forkmann G, Britsch L, Wellmann F, Matern U, Lukačín R. Divergent evolution of  
372 flavonoid 2-oxoglutarate-dependent dioxygenases in parsley 1. *FEBS Letters.* 2003;544:93–8.
- 373 21. Iorizzo M, Ellison S, Senalik D, Zeng P, Satapoomin P, Huang J, et al. A high-quality carrot genome  
374 assembly provides new insights into carotenoid accumulation and asterid genome evolution. *Nat Genet.*  
375 2016;48:657–66.
- 376 22. Jiang Z, Tu L, Yang W, Zhang Y, Hu T, Ma B, et al. The chromosome-level reference genome assembly  
377 for *Panax notoginseng* and insights into ginsenoside biosynthesis. *Plant Communications.*  
378 2021;2:100113.
- 379 23. Li M-Y, Feng K, Hou X-L, Jiang Q, Xu Z-S, Wang G-L, et al. The genome sequence of celery (*Apium*  
380 *graveolens* L.), an important leaf vegetable crop rich in apigenin in the Apiaceae family. *Hortic Res.*  
381 2020;7:1–10.
- 382 24. Pootakham W, Naktang C, Kongkachana W, Sonthirod C, Yoocha T, Sangsrakru D, et al. De novo  
383 chromosome-level assembly of the *Centella asiatica* genome. *Genomics.* 2021;113:2221–8.

- 384 25. Goodstein DM, Shu S, Howson R, Neupane R, Hayes RD, Fazo J, et al. Phytozome: a comparative  
385 platform for green plant genomics. *Nucleic Acids Res.* 2012;40 Database issue:D1178–86.
- 386 26. Pucker B, Reiher F, Schilbert HM. Automatic Identification of Players in the Flavonoid Biosynthesis  
387 with Application on the Biomedicinal Plant *Croton tiglium*. *Plants.* 2020;9:1103.
- 388 27. Downie SR, Katz-Downie DS, Watson MF. A phylogeny of the flowering plant family Apiaceae based  
389 on chloroplast DNA *rpl16* and *rpoC1* intron sequences: towards a suprageneric classification of subfamily  
390 Apioideae. *Am J Bot.* 2000;87:273–92.
- 391 28. Stanke M, Keller O, Gunduz I, Hayes A, Waack S, Morgenstern B. AUGUSTUS: ab initio prediction of  
392 alternative transcripts. *Nucleic Acids Res.* 2006;34 suppl\_2:W435–9.
- 393 29. Pucker B, Holtgräwe D, Weisshaar B. Consideration of non-canonical splice sites improves gene  
394 prediction on the *Arabidopsis thaliana* Niederzenz-1 genome sequence. *BMC Research Notes.*  
395 2017;10:667.
- 396 30. Robinson JT, Thorvaldsdóttir H, Winckler W, Guttman M, Lander ES, Getz G, et al. Integrative  
397 Genomics Viewer. *Nat Biotechnol.* 2011;29:24–6.
- 398 31. Gertz EM, Yu Y-K, Agarwala R, Schäffer AA, Altschul SF. Composition-based statistics and translated  
399 nucleotide searches: Improving the TBLASTN module of BLAST. *BMC Biology.* 2006;4:41.
- 400 32. Dobin A, Davis CA, Schlesinger F, Drenkow J, Zaleski C, Jha S, et al. STAR: ultrafast universal RNA-seq  
401 aligner. *Bioinformatics.* 2013;29:15–21.
- 402 33. Haak M, Vinke S, Keller W, Droste J, Rückert C, Kalinowski J, et al. High Quality de Novo  
403 Transcriptome Assembly of *Croton tiglium*. *Front Mol Biosci.* 2018;5.
- 404 34. Pucker B. Apiaceae FNS I. <https://github.com/bpucker/ApiaceaeFNS1>. 2022.
- 405 35. Price MN, Dehal PS, Arkin AP. FastTree 2 – Approximately Maximum-Likelihood Trees for Large  
406 Alignments. *PLOS ONE.* 2010;5:e9490.
- 407 36. Katoh K, Standley DM. MAFFT Multiple Sequence Alignment Software Version 7: Improvements in  
408 Performance and Usability. *Mol Biol Evol.* 2013;30:772–80.
- 409 37. Edgar RC. High-accuracy alignment ensembles enable unbiased assessments of sequence homology  
410 and phylogeny. 2022;:2021.06.20.449169.
- 411 38. Kozlov AM, Darriba D, Flouri T, Morel B, Stamatakis A. RAxML-NG: a fast, scalable and user-friendly  
412 tool for maximum likelihood phylogenetic inference. *Bioinformatics.* 2019;35:4453–5.
- 413 39. Kalyaanamoorthy S, Minh BQ, Wong TKF, von Haeseler A, Jermiin LS. ModelFinder: fast model  
414 selection for accurate phylogenetic estimates. *Nat Methods.* 2017;14:587–9.
- 415 40. Minh BQ, Schmidt HA, Chernomor O, Schrempf D, Woodhams MD, von Haeseler A, et al. IQ-TREE 2:  
416 New Models and Efficient Methods for Phylogenetic Inference in the Genomic Era. *Molecular Biology  
417 and Evolution.* 2020;37:1530–4.

- 418 41. Tamura K, Stecher G, Kumar S. MEGA11: Molecular Evolutionary Genetics Analysis Version 11. *Mol*  
419 *Biol Evol.* 2021;38:3022–7.
- 420 42. Tang H, Krishnakumar V, Li J. jcvl: JCVI utility libraries (v0.5.7). 2015.  
421 <https://doi.org/10.5281/zenodo.31631>.
- 422 43. Altschul SF, Gish W, Miller W, Myers EW, Lipman DJ. Basic local alignment search tool. *J Mol Biol.*  
423 1990;215:403–10.
- 424 44. Leinonen R, Sugawara H, Shumway M, on behalf of the International Nucleotide Sequence Database  
425 Collaboration. The Sequence Read Archive. *Nucleic Acids Research.* 2011;39 suppl\_1:D19–21.
- 426 45. Bray NL, Pimentel H, Melsted P, Pachter L. Near-optimal probabilistic RNA-seq quantification. *Nat*  
427 *Biotechnol.* 2016;34:525–7.
- 428 46. Pucker B, Holtgräwe D, Sörensen TR, Stracke R, Viehöver P, Weisshaar B. A De Novo Genome  
429 Sequence Assembly of the *Arabidopsis thaliana* Accession Niederzenz-1 Displays Presence/Absence  
430 Variation and Strong Synteny. *PLOS ONE.* 2016;11:e0164321.
- 431 47. Rempel A, Pucker B. BioInfToolServer. *BioInfToolServer.* 2022. <http://pbb.bot.nat.tu-bs.de/KIPes/>.  
432 Accessed 31 May 2022.
- 433 48. Gebhardt Y, Witte S, Forkmann G, Lukacin R, Matern U, Martens S. Molecular evolution of flavonoid  
434 dioxygenases in the family Apiaceae. *Phytochemistry.* 2005;66:1273–84.
- 435 49. Polturak G, Osbourn A. The emerging role of biosynthetic gene clusters in plant defense and plant  
436 interactions. *PLOS Pathogens.* 2021;17:e1009698.
- 437 50. Polturak G, Liu Z, Osbourn A. New and emerging concepts in the evolution and function of plant  
438 biosynthetic gene clusters. *Current Opinion in Green and Sustainable Chemistry.* 2022;33:100568.
- 439 51. Du Y, Chu H, Wang M, Chu IK, Lo C. Identification of flavone phytoalexins and a pathogen-inducible  
440 flavone synthase II gene (SbFNSII) in sorghum. *J Exp Bot.* 2010;61:983–94.

441

442
